# Supplementary material
Source: Springer Nature journal article supplement (https://www.springermedizin.de/resource/supplementary/13058_2008_2065_MOESM3_ESM.pdf/9700556)
Supplement: MOESM3 [file 9700556]

SUPPLEMENTARY INFORMATION Brozkova et al. Table B

Table B. Classification of peaks according to hierarchical clustering.

| Categorization |   |   | Peaks in a group           |                                              |                                             |                                     |                      |     |
|----------------|---|---|----------------------------|----------------------------------------------|---------------------------------------------|-------------------------------------|----------------------|-----|
| 1              | 1 | 1 | 3                          | 80,81,82                                     | 99,100,101,102,103,104,105                  | 117,118                             | 121,122,124          |     |
|                |   | 2 | 7                          | 12                                           | 26,27,28                                    | 41,42,43,45,46,47,48,49,50,51,52,54 | 64                   |     |
| 2              | 2 | 3 | 4                          | 10,11,13,14,15,16,17,18,19,20,21,22,24       |                                             |                                     | 31                   | 44  |
|                |   | 4 | 1,2,5,6,8,9                |                                              | 23,25 29,30,32,33,34,35,36,37,38,40         |                                     |                      |     |
|                | 3 | 5 | 90,91,92,93,94,95,96,97,98 |                                              | 106,107,108,109,110,111,112,113,114,115,116 |                                     |                      | 120 |
|                |   | 6 | 39                         | 61,63,65,67,68,70,71,72,73,74,75,76,77,78,79 |                                             |                                     | 83,84,85,86,87,88,89 |     |
|                |   |   | 119                        | 123,125,126,127,128,129,130                  |                                             |                                     |                      |     |
